# Supplementary material
Source: PubMed Central journal article supplement (PMC4041844)
Supplement: NIHMS577672-supplement-S1.pdf [file NIHMS577672-supplement-S1.pdf]

Supplemental Materials. The following four tables are supplemental materials that the authors request be made available online.

Table 5  
*Results of Hierarchical Regressions Testing Predictive Utility of Behavioral Economic Metrics of Alcohol Value for Alcohol Use and Related Problems for Men*

| Variable              | B        | SEB    | $\beta$ | R <sup>2</sup> | $\Delta R^2$ | t(df)           |
|-----------------------|----------|--------|---------|----------------|--------------|-----------------|
| <b>Total Drinks</b>   |          |        |         |                |              |                 |
| Step 1                |          |        |         | .11            |              |                 |
| Age                   | .32      | .83    | .04     |                |              | t(94) = .38     |
| Ethnicity             | 11.30    | 3.31   | .33     |                |              | t(94) = 3.42**  |
| Step 2                |          |        |         | .38            | .27          |                 |
| Intensity             | .1.03    | .16    | .53     |                |              | t(93) = 6.31**  |
| Step 2                |          |        |         | .14            | .03          |                 |
| Breakpoint            | .55      | .29    | .19     |                |              | t(93) = 1.89    |
| Step 2                |          |        |         | .28            | .17          |                 |
| O <sub>max</sub>      | .52      | .11    | .42     |                |              | t(93) = 4.63**  |
| Step 2                |          |        |         | .11            | .00          |                 |
| P <sub>max</sub>      | -.17     | .67    | -.03    |                |              | t(92) = -.25    |
| Step 2                |          |        |         | .24            | .13          |                 |
| Elasticity            | -1410.46 | 354.37 | -.38    |                |              | t(90) = -3.98** |
| Step 2                |          |        |         | .26            | .14          |                 |
| RR                    | 33.39    | 8.04   | .39     |                |              | t(90) = 4.15**  |
| Step 2                |          |        |         | .18            | .10          |                 |
| RDEA                  | 19.94    | 6.18   | .32     |                |              | t(87) = 3.23**  |
| Step 2                |          |        |         | .41            | .30          |                 |
| Intensity             | .83      | .18    | .43     |                |              | t(92) = 4.53**  |
| O <sub>max</sub>      | .26      | .12    | .21     |                |              | t(92) = 2.22*   |
| Step 2                |          |        |         | .36            | .27          |                 |
| Elasticity            | -1209.69 | 350.95 | -.34    |                |              | t(80) = -3.46** |
| RR                    | 26.75    | 8.37   | .30     |                |              | t(80) = 3.20**  |
| RDEA                  | 7.25     | 6.24   | .12     |                |              | t(80) = 1.16    |
| Step 2                |          |        |         | .43            | .31          |                 |
| Amplitude             | 3.58     | .52    | .58     |                |              | t(86) = 6.85**  |
| Step 2                |          |        |         | .13            | .02          |                 |
| Persistence           | 1.08     | .73    | .15     |                |              | t(89) = 1.49    |
| <b>Total Problems</b> |          |        |         |                |              |                 |
| Step 1                |          |        |         | .32            |              |                 |
| Age                   | 1.38     | .44    | .27     |                |              | t(93) = 3.12**  |
| Ethnicity             | 3.24     | 1.86   | .16     |                |              | t(93) = 1.74    |
| Drinks                | .25      | .06    | .42     |                |              | t(93) = 4.61**  |
| Step 2                |          |        |         | .32            | .01          |                 |
| Intensity             | -.10     | .12    | -.09    |                |              | t(92) = -.82    |
| Step 2                |          |        |         | .33            | .01          |                 |
| Breakpoint            | .21      | .16    | .11     |                |              | t(92) = 1.29    |
| Step 2                |          |        |         | .40            | .08          |                 |
| O <sub>max</sub>      | .24      | .07    | .33     |                |              | t(92) = 3.59**  |
| Step 2                |          |        |         | .32            | .01          |                 |
| P <sub>max</sub>      | .47      | .35    | .12     |                |              | t(91) = 1.34    |

| Variable    | B       | SEB    | $\beta$ | $R^2$ | $\Delta R^2$ | $t(df)$             |
|-------------|---------|--------|---------|-------|--------------|---------------------|
| Step 2      |         |        |         | .33   | .03          |                     |
| Elasticity  | -425.28 | 215.60 | -.19    |       |              | $t(89) = -1.97^*$   |
| Step 2      |         |        |         | .35   | .01          |                     |
| RR          | 5.54    | 4.93   | .11     |       |              | $t(89) = 1.12$      |
| Step 2      |         |        |         | .34   | .00          |                     |
| RDEA        | -.06    | 3.66   | -.00    |       |              | $t(86) = -.02$      |
| Step 2      |         |        |         | .40   | .10          |                     |
| $O_{max}$   | .26     | .08    | .35     |       |              | $t(88) = 3.13^{**}$ |
| Elasticity  | -15.65  | 243.85 | -.01    |       |              | $t(88) = -.06$      |
| Step 2      |         |        |         | .35   | .02          |                     |
| Amplitude   | .67     | .41    | .18     |       |              | $t(85) = 1.61$      |
| Step 2      |         |        |         | .33   | .04          |                     |
| Persistence | .85     | .38    | .20     |       |              | $t(88) = 2.22^*$    |

\* $p \leq .05$ , \*\*  $p \leq .01$ ; RR = Reinforcement ratio; RDEA = Relative discretionary expenditures towards alcohol. For clarity, only step one of a single regression is included. Although values were slightly different, in each regression for typical drinks only ethnicity was a significant predictor, and for problems, age and typical drinks per week were significant predictors.

Table 6  
*Results of Hierarchical Regressions Testing Predictive Utility of Behavioral Economic Metrics of Alcohol Use for Alcohol Use and Related Problems for Women*

| Variable              | B       | SEB    | $\beta$ | R <sup>2</sup> | $\Delta R^2$ | t(df)            |
|-----------------------|---------|--------|---------|----------------|--------------|------------------|
| <b>Total Drinks</b>   |         |        |         |                |              |                  |
| Step 1                |         |        |         | .17            |              |                  |
| Age                   | .38     | .33    | .10     |                |              | t(105) = 1.17    |
| Ethnicity             | 6.39    | 1.42   | .40     |                |              | t(105) = 4.50**  |
| Step 2                |         |        |         | .30            | .13          |                  |
| Intensity             | .47     | .11    | .37     |                |              | t(105) = 4.39**  |
| Step 2                |         |        |         | .24            | .06          |                  |
| Breakpoint            | .39     | .13    | .26     |                |              | t(105) = 2.98**  |
| Step 2                |         |        |         | .38            | .21          |                  |
| O <sub>max</sub>      | .37     | .06    | .47     |                |              | t(105) = 5.94**  |
| Step 2                |         |        |         | .17            | .01          |                  |
| P <sub>max</sub>      | .24     | .27    | .08     |                |              | t(104) = .86     |
| Step 2                |         |        |         | .25            | .08          |                  |
| Elasticity            | -362.00 | 113.37 | -.28    |                |              | t(103) = -3.20** |
| Step 2                |         |        |         | .30            | .12          |                  |
| RR                    | 16.88   | 4.05   | .35     |                |              | t(101) = 4.17**  |
| Step 2                |         |        |         | .19            | .02          |                  |
| RDEA                  | 6.75    | 1.51   | .41     |                |              | t(99) = 4.49**   |
| Step 2                |         |        |         | .40            | .23          |                  |
| Intensity             | .23     | .12    | .18     |                |              | t(102) = 1.98*   |
| Breakpoint            | -.12    | .16    | -.08    |                |              | t(102) = -.75    |
| O <sub>max</sub>      | .33     | .09    | .42     |                |              | t(102) = 3.63**  |
| Step 2                |         |        |         | .34            | .17          |                  |
| Elasticity            | -226.02 | 120.18 | -.18    |                |              | t(90) = -1.88    |
| RR                    | 14.79   | 4.44   | .31     |                |              | t(90) = 3.33**   |
| RDEA                  | 2.06    | 2.88   | .07     |                |              | t(90) = .72      |
| Step 2                |         |        |         | .36            | .20          |                  |
| Amplitude             | 1.84    | .34    | .46     |                |              | t(94) = 5.38**   |
| Step 2                |         |        |         | .21            | .04          |                  |
| Persistence           | .75     | .35    | .19     |                |              | t(103) = 2.12*   |
| <b>Total Problems</b> |         |        |         |                |              |                  |
| Step 1                |         |        |         | .16            |              |                  |
| Age                   | .34     | .32    | .10     |                |              | t(104) = 1.08    |
| Ethnicity             | 1.63    | 1.50   | .11     |                |              | t(104) = 1.09    |
| Drinks                | .31     | .09    | .33     |                |              | t(104) = 3.31**  |
| Step 2                |         |        |         | .18            | .02          |                  |
| Intensity             | .19     | .12    | .16     |                |              | t(103) = 1.60    |
| Step 2                |         |        |         | .20            | .02          |                  |
| Breakpoint            | .22     | .14    | .15     |                |              | t(104) = 1.60    |
| Step 2                |         |        |         | .19            | .02          |                  |
| O <sub>max</sub>      | .12     | .08    | .16     |                |              | t(104) = 1.50    |
| Step 2                |         |        |         | .26            | .06          |                  |
| P <sub>max</sub>      | .70     | .25    | .24     |                |              | t(103) = 2.83**  |

| Variable    | B       | SEB    | $\beta$ | $R^2$ | $\Delta R^2$ | $t(df)$              |
|-------------|---------|--------|---------|-------|--------------|----------------------|
| Step 2      |         |        |         | .22   | .02          |                      |
| Elasticity  | -208.16 | 116.08 | -.17    |       |              | $t(102) = -1.79$     |
| Step 2      |         |        |         | .24   | .06          |                      |
| RR          | 12.71   | 4.36   | .28     |       |              | $t(100) = 2.92^{**}$ |
| Step 2      |         |        |         | .17   | .00          |                      |
| RDEA        | -.41    | 2.98   | -.01    |       |              | $t(98) = -.14$       |
| Step 2      |         |        |         | .31   | .11          |                      |
| $P_{max}$   | .50     | .27    | .17     |       |              | $t(97) = 1.87$       |
| RR          | 11.30   | 4.53   | .25     |       |              | $t(97) = 2.50^{**}$  |
| Step 2      |         |        |         | .22   | .02          |                      |
| Amplitude   | .60     | .41    | .16     |       |              | $t(93) = 1.46$       |
| Step 2      |         |        |         | .23   | .03          |                      |
| Persistence | .72     | .34    | .19     |       |              | $t(102) = 2.11^*$    |

\* $p \leq .05$ , \*\* $p \leq .01$ ; RR = Reinforcement ratio; RDEA = Relative discretionary expenditures towards alcohol. For clarity, only step one of a single regression for typical drinks and alcohol-related problems is included. Although values were slightly different, in each regression for typical drinks on ethnicity was a significant predictor and for alcohol-related problems only typical drinks per week was a significant predictor.

Table 7

*Results of Hierarchical Regressions Testing Predictive Utility Beyond Established Risk Factors of Behavioral Economic Metrics of Alcohol Value for Alcohol Use and Related Problems for Men*

| Variable              | B       | SEB    | $\beta$ | R <sup>2</sup> | $\Delta R^2$ | t(df)          |
|-----------------------|---------|--------|---------|----------------|--------------|----------------|
| <b>Total Problems</b> |         |        |         |                |              |                |
| Step 1                |         |        |         | .32            |              |                |
| Age                   | 1.38    | .45    | .27     |                |              | t(92) = 3.10   |
| Ethnicity             | 3.27    | 1.88   | .16     |                |              | t(92) = 1.74   |
| Drinks                | .25     | .06    | .42     |                |              | t(92) = 4.56** |
| Step 2                |         |        |         | .36            | .04          |                |
| PB                    | -.15    | .06    | -.21    |                |              | t(91) = -2.41* |
| Step 3                |         |        |         | .37            | .01          |                |
| Intensity             | -.15    | .13    | -.13    |                |              | t(90) = -1.20  |
| Step 3                |         |        |         | .37            | .01          |                |
| Breakpoint            | .18     | .16    | .10     |                |              | t(90) = 1.13   |
| Step 3                |         |        |         | .44            | .08          |                |
| O <sub>max</sub>      | .24     | .07    | .32     |                |              | t(90) = 3.58** |
| Step 3                |         |        |         | .36            | .01          |                |
| P <sub>max</sub>      | .47     | .35    | .12     |                |              | t(89) = 1.36   |
| Step 3                |         |        |         | .36            | .02          |                |
| Elasticity            | -363.10 | 217.29 | -.16    |                |              | t(87) = -1.67  |
| Step 3                |         |        |         | .41            | .02          |                |
| RR                    | 7.85    | 4.84   | .15     |                |              | t(87) = 1.62   |
| Step 3                |         |        |         | .40            | .00          |                |
| RDEA                  | .15     | 3.83   | .00     |                |              | t(84) = .04    |
| Step 3                |         |        |         | .40            | .02          |                |
| Amplitude             | .75     | .41    | .20     |                |              | t(83) = 1.81   |
| Step 3                |         |        |         | .37            | .04          |                |
| Persistence           | .88     | .38    | .21     |                |              | t(86) = 2.34*  |
| Step 2                |         |        |         | .32            | .00          |                |
| Sensation seeking     | .00     | .27    | .00     |                |              | t(92) = -.01   |
| Step 2                |         |        |         | .38            | .09          |                |
| Depression            | .43     | .12    | .31     |                |              | t(82) = 3.46** |
| Step 3                |         |        |         | .42            | .04          |                |
| Intensity             | -.30    | .13    | -.26    |                |              | t(81) = -2.39* |
| Step 3                |         |        |         | .39            | .01          |                |
| Breakpoint            | .18     | .16    | .10     |                |              | t(81) = 1.09   |
| Step 3                |         |        |         | .38            | .06          |                |
| O <sub>max</sub>      | .21     | .07    | .29     |                |              | t(81) = 2.98** |
| Step 3                |         |        |         | .39            | .02          |                |
| P <sub>max</sub>      | .54     | .35    | .14     |                |              | t(79) = 1.56   |
| Step 3                |         |        |         | .39            | .02          |                |
| Elasticity            | -315.84 | 216.83 | -.15    |                |              | t(79) = -1.46  |
| Step 3                |         |        |         | .41            | .01          |                |
| RR                    | 5.02    | 5.28   | .09     |                |              | t(78) = .95    |
| Step 3                |         |        |         | .41            | .01          |                |
| RDEA                  | -1.17   | 3.91   | -.03    |                |              | t(76) = -.30   |

| Variable    | B   | SEB | $\beta$ | $R^2$ | $\Delta R^2$ | $t(df)$          |
|-------------|-----|-----|---------|-------|--------------|------------------|
| Step 3      |     |     |         | .39   | .00          |                  |
| Amplitude   | .19 | .44 | .05     |       |              | $t(75) = .42$    |
| Step 3      |     |     |         | .39   | .03          |                  |
| Persistence | .78 | .38 | .19     |       |              | $t(78) = 2.04^*$ |

\* $p \leq .05$ , \*\* $p \leq .01$ ; PB = Protective Behaviors; RR = Reinforcement ratio; RDEA = Relative discretionary expenditures towards alcohol. For clarity, only step one and step two of a single regression for alcohol-related problems is included. Although values were slightly different, in each regression typical drinks per week was a significant predictor. Similarly, for each regression protective behaviors and depression symptoms were significant predictors (sensation seeking was not).

Table 8

*Results of Hierarchical Regressions Testing Predictive Utility Beyond Established Risk Factors of Behavioral Economic Metrics of Alcohol Value for Alcohol Use and Related Problems for Women*

| Variable              | B       | SEB    | $\beta$ | R <sup>2</sup> | $\Delta R^2$ | t(df)           |
|-----------------------|---------|--------|---------|----------------|--------------|-----------------|
| <b>Total Problems</b> |         |        |         |                |              |                 |
| Step 1                |         |        |         | .16            |              |                 |
| Age                   | .34     | .32    | .10     |                |              | t(104) = 1.08   |
| Ethnicity             | 1.63    | 1.50   | .11     |                |              | t(104) = 1.09   |
| Drinks                | .32     | .09    | .33     |                |              | t(104) = 3.31** |
| Step 2                |         |        |         | .22            | .06          |                 |
| PB                    | -.16    | .06    | -.25    |                |              | t(103) = -2.80* |
| Step 3                |         |        |         | .23            | .01          |                 |
| Intensity             | .14     | .12    | .11     |                |              | t(102) = -1.13  |
| Step 3                |         |        |         | .24            | .01          |                 |
| Breakpoint            | .13     | .14    | .09     |                |              | t(103) = .95    |
| Step 3                |         |        |         | .24            | .00          |                 |
| O <sub>max</sub>      | .06     | .08    | .08     |                |              | t(103) = .73    |
| Step 3                |         |        |         | .31            | .03          |                 |
| P <sub>max</sub>      | .54     | .25    | .19     |                |              | t(102) = 2.15*  |
| Step 3                |         |        |         | .28            | .01          |                 |
| Elasticity            | -122.32 | 116.44 | -.10    |                |              | t(101) = -1.05  |
| Step 3                |         |        |         | .28            | .05          |                 |
| RR                    | 10.83   | 4.34   | .24     |                |              | t(99) = 2.49**  |
| Step 3                |         |        |         | .21            | .00          |                 |
| RDEA                  | -.24    | 2.91   | -.01    |                |              | t(84) = -.08    |
| Step 3                |         |        |         | .27            | .01          |                 |
| Amplitude             | .49     | .40    | .13     |                |              | t(92) = 1.23    |
| Step 3                |         |        |         | .29            | .02          |                 |
| Persistence           | .52     | .34    | .14     |                |              | t(101) = 1.56   |
| Step 2                |         |        |         | .16            | .00          |                 |
| Sensation seeking     | -.11    | .24    | -.04    |                |              | t(103) = -.47   |
| Step 2                |         |        |         | .19            | .04          |                 |
| Depression            | .20     | .09    | .21     |                |              | t(99) = 2.25*   |
| Step 3                |         |        |         | .21            | .02          |                 |
| Intensity             | .17     | .12    | .14     |                |              | t(98) = 1.35    |
| Step 3                |         |        |         | .23            | .02          |                 |
| Breakpoint            | .23     | .14    | .16     |                |              | t(99) = 1.73    |
| Step 3                |         |        |         | .22            | .02          |                 |
| O <sub>max</sub>      | .13     | .08    | .18     |                |              | t(99) = 2.98**  |
| Step 3                |         |        |         | .28            | .05          |                 |
| P <sub>max</sub>      | .67     | .25    | .23     |                |              | t(98) = 1.56    |
| Step 3                |         |        |         | .26            | .04          |                 |
| Elasticity            | -257.75 | 116.91 | -.21    |                |              | t(97) = -2.21*  |
| Step 3                |         |        |         | .25            | .05          |                 |
| RR                    | 11.40   | 4.53   | .25     |                |              | t(95) = 2.52**  |
| Step 3                |         |        |         | .19            | .00          |                 |
| RDEA                  | -1.75   | 3.04   | -.06    |                |              | t(95) = -.58    |



| Variable    | B   | SEB | $\beta$ | $R^2$ | $\Delta R^2$ | $t(df)$          |
|-------------|-----|-----|---------|-------|--------------|------------------|
| Step 3      |     |     |         | .22   | .01          |                  |
| Amplitude   | .46 | .42 | .12     |       |              | $t(89) = 1.08$   |
| Step 3      |     |     |         | .26   | .03          |                  |
| Persistence | .68 | .35 | .18     |       |              | $t(97) = 1.98^*$ |

\* $p \leq .05$ , \*\* $p \leq .01$ ; PB = Protective Behaviors; RR = Reinforcement ratio; RDEA = Relative discretionary expenditures towards alcohol. For clarity, only step one and step two of a single regression for alcohol-related problems is included. Although values were slightly different, in each regression typical drinks per week was a significant predictor. Similarly, for each regression protective behaviors and depression symptoms were significant predictors (sensation seeking was not).
